# Supplementary material for: Rapid Proteomic Characterization of Bacteriocin-Producing Enterococcus faecium Strains from Foodstuffs
Source: MDPI journal article supplement (doi:10.3390/ijms232213830), 2022-11-10

Figure S1: Heatmap with the quantitative functional annotation of the LHICA 28.4 and LHICA 40.4 proteomes. Quantitative data was transformed into a logarithmic scale, and data were normalized by column to improve the visualization.

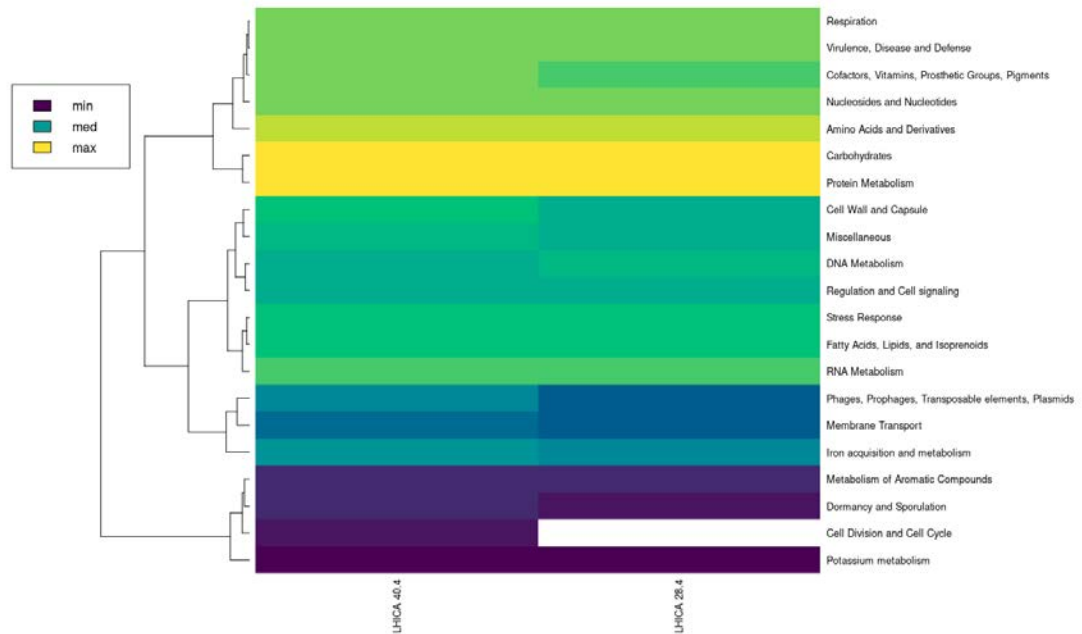

Supplement: s1 [file s1]
